# Supplementary material
Source: Springer Nature journal article supplement (https://www.springermedizin.de/resource/supplementary/12889_2011_3982_MOESM4_ESM.pdf/9492988)

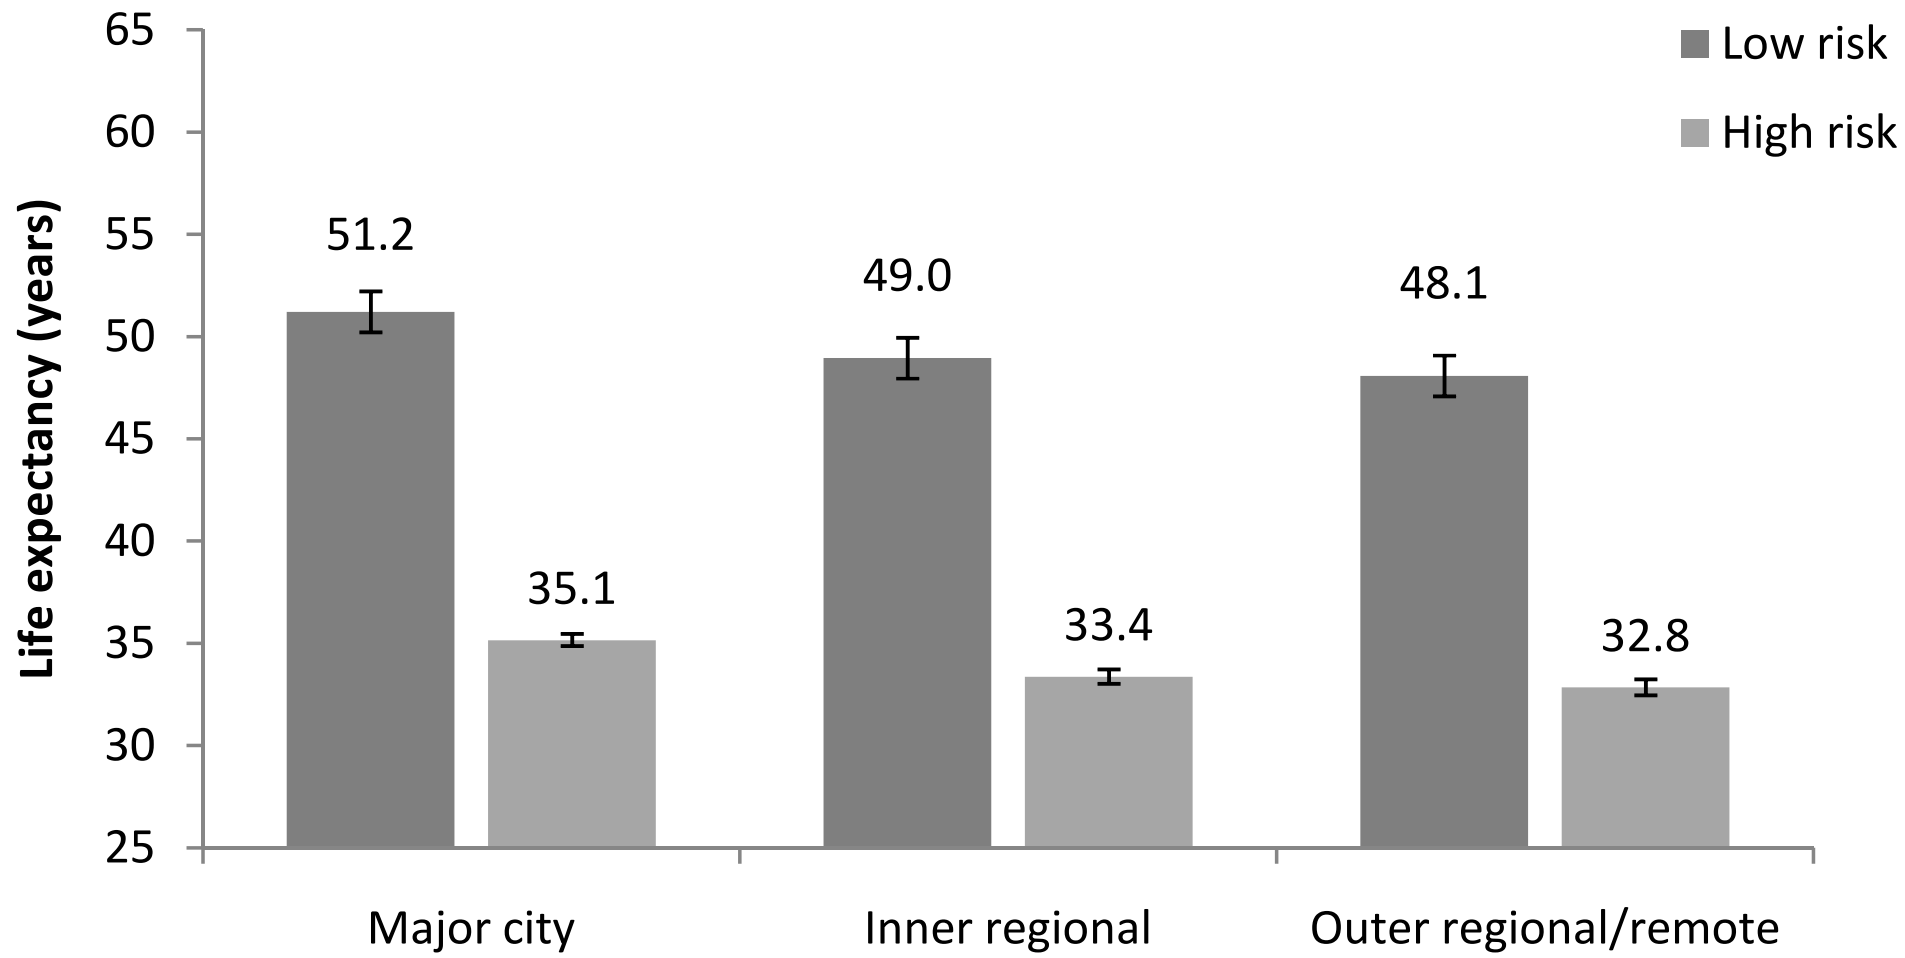

Supplement: MOESM4 [file 9492988]
